# Supplementary material
Source: Springer Nature journal article supplement (https://www.springermedizin.de/resource/supplementary/12879_2013_3137_MOESM1_ESM.pdf/9446064)

Daily Defined Dose per 100 patients bed days

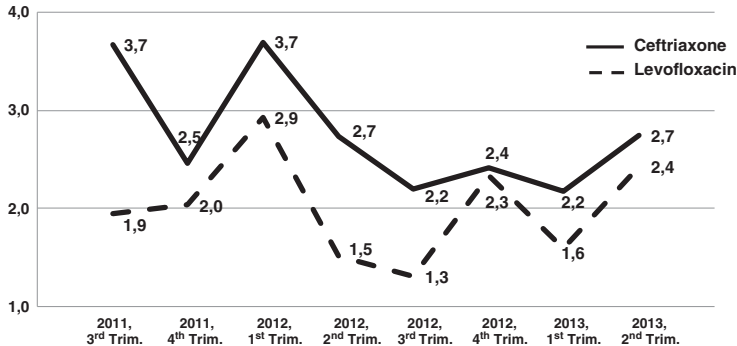

Supplement: MOESM1 [file 9446064]
